# Supplementary material for: Association Between Early Acetaminophen Exposure and Sepsis-Associated Acute Kidney Injury: A Retrospective Cohort Study
Source: Research Square preprint supplement (doi:10.21203/rs.3.rs-6712781/v1), 2025-05-28
Supplement: Supplementary file 1 [file 22f70641703dbee05f71b665.docx]

**Table S3. Proportion of missing data of AKI-related risk factors in the primary and validation cohorts**

| **Risk factors** | **Missing number (%)** | |
| --- | --- | --- |
| **Primary cohort (n=13708)** | **Validation cohort (n=20740)** |
| Age | 0 (0%) | 0 (0%) |
| Gender | 0 (0%) | 0 (0%) |
| Race | 0 (0%) | 0 (0%) |
| Diabetes mellitus | 0 (0%) | 0 (0%) |
| Chronic liver disease | 0 (0%) | 0 (0%) |
| Congestive heart failure | 0 (0%) | 0 (0%) |
| Baseline eGFR | 0 (0%) | 0 (0%) |
| Invasive ventilation | 0 (0%) | 0 (0%) |
| Nephrotoxins | 0 (0%) | 0 (0%) |
| Vasopressors | 0 (0%) | 0 (0%) |
| Temperature | 623 (4.5%) | 891 (4.3%) |
| Mean arterial pressure | 0 (0%) | 0 (0%) |
| WBC | 21 (<0.1%) | 214 (1.0%) |
| RDW | 26 (<0.1%) | 1484 (7.2%) |
| Lactate | 3630 (26.5%) | 6287 (30.3%) |
| APACHE IV | -- | 1902 (9.2%) |
| SOFA | 0 (0%) | 0 (0%) |
| SAPS II | 0 (0%) | -- |

**Abbreviations:** *eGFR,* estimated glomerular filtration rate; *WBC,* white blood cell count; *RDW,* red cell distribution width; *APACHE IV,* Acute Physiology and Chronic Health Evaluation IV; *SOFA,* Sequential Organ Failure Assessment; *SAPS II,* Simplified Acute Physiology Score II.
