# Supplementary material for: Association Between Early Acetaminophen Exposure and Sepsis-Associated Acute Kidney Injury: A Retrospective Cohort Study
Source: Research Square preprint supplement (doi:10.21203/rs.3.rs-6712781/v1), 2025-05-28
Supplement: Supplementary file 2 [file 886bed80a2a69f02c392bc88.docx]

**Table S2. The equation to estimate baseline levels of Scr and eGFR**

|  | **Age** | **Gender** | **Scr,**  **mg/dL** | **Race** | **Equation** |
| --- | --- | --- | --- | --- | --- |
| Baseline  Scr **a** | >18 | Female | --- | Black | =(75/[186×(age)-0.203×0.742×1.21])-0.887 |
|  |  | --- | Others | =(75/[186×(age)-0.203×0.742])-0.887 |
| >18 | Male | --- | Black | =(75/[186×(age)-0.203×1.21])-0.887 |
|  |  | --- | Others | =(75/[186×(age)-0.203])-0.887 |
| Baseline  eGFR **b** | >18 | Female | ≤ 0.7 | --- | =142×(Scr/0.7)-0.241×0.9938age×1.012 |
|  |  | > 0.7 | --- | =142×(Scr/0.7)-1.200×0.9938age×1.012 |
| >18 | Male | ≤ 0.9 | --- | =142×(Scr/0.9)-0.302×0.9938age |
|  |  | > 0.9 | --- | =142×(Scr/0.9)-1.200×0.9938age |

**a** Baseline Scr was calculated by the CKD Epidemiology Collaboration (CKD-EPI) creatinine equation

b Baseline eGFR was calculated by the Modification of Diet in Renal Disease (MDRD) equation

**Abbreviations:** Scr, serum creatinine; eGFR, estimated glomerular filtration rate
