# Supplementary material for: Association Between Early Acetaminophen Exposure and Sepsis-Associated Acute Kidney Injury: A Retrospective Cohort Study
Source: Research Square preprint supplement (doi:10.21203/rs.3.rs-6712781/v1), 2025-05-28
Supplement: Supplementary file 3 [file ec2bf7e7f6cafe122a2d959c.docx]

**Table S1. Vasopressors and high-risk nephrotoxic drugs**

| **Vasopressors** | | |
| --- | --- | --- |
| Dopamine | Epinephrine | Norepinephrine |
| Phenylephrine | Vasopressin |  |
| **High-risk nephrotoxic drugs** | | |
| Acyclovir | Hydroxyurea | Mesalamine |
| Amikacin | Ibuprofen | Methotrexate |
| Amphotericin B | Ifosfamide | Naproxen |
| Cidofovir | Imatinib | Neomycin |
| Cisplatin | Indomethacin | Sirolimus |
| Colistimethate | IVIG | Streptomycin |
| Cyclophosphamide | Ketorolac | Tacrolimus |
| Cyclosporine | Lomustine | Tobramycin |
| Fludarabine | Meloxicam | Vancomycin |
| Gentamicin | Mercaptopurine |  |
