# Supplementary figures and images for: Association Between Early Acetaminophen Exposure and Sepsis-Associated Acute Kidney Injury: A Retrospective Cohort Study
Source: Research Square preprint supplement (doi:10.21203/rs.3.rs-6712781/v1), 2025-05-28

**a**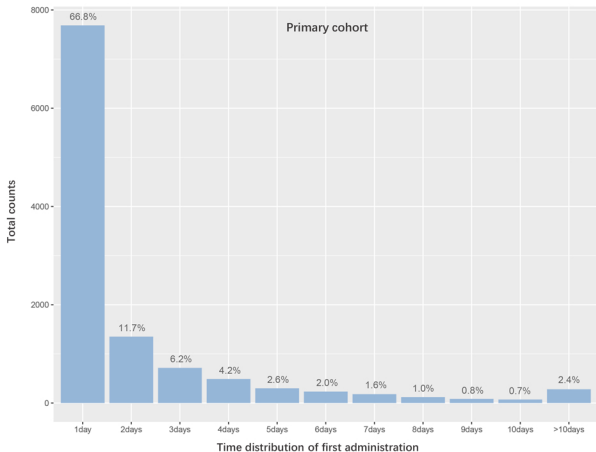**b**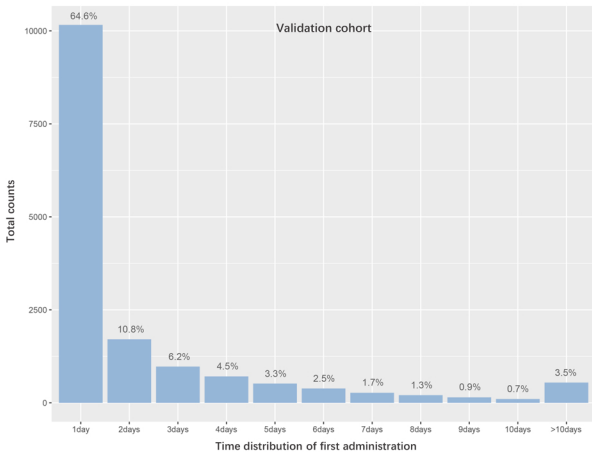

Supplement: Supplementary file 1 [file 38430f7f5ab1233db9f7087b.pdf]

**a**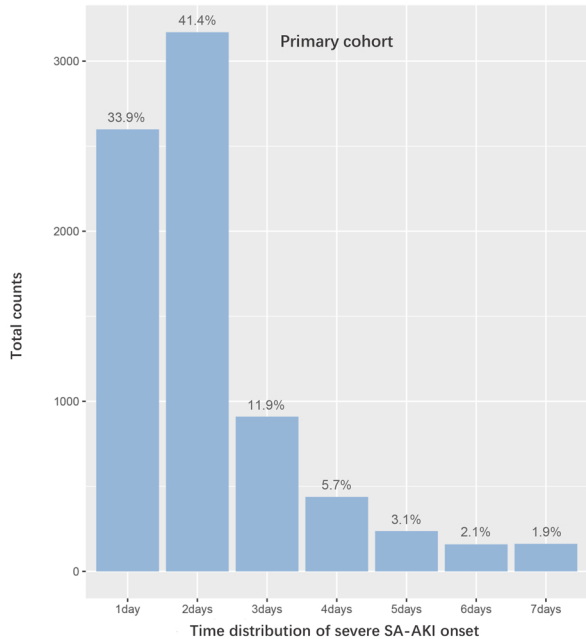**b**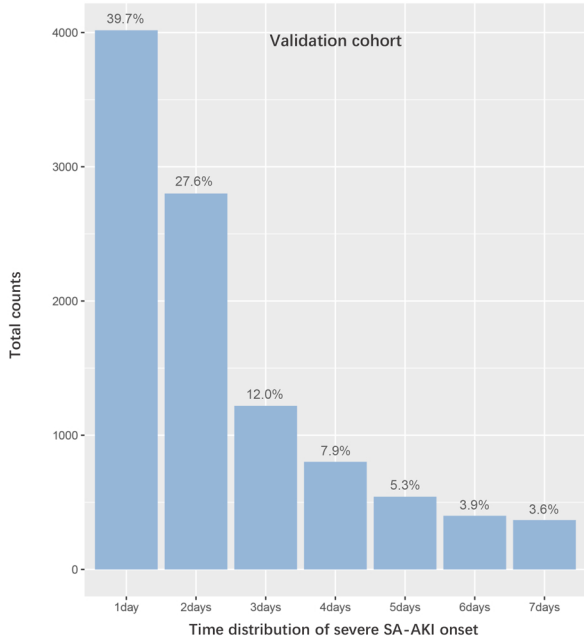

Supplement: Supplementary file 2 [file 56825aa6d08a823847f3e91d.pdf]
